# Supplementary material for: Human Exposure to Pesticides in Dust from Two Agricultural Sites in South Africa
Source: MDPI journal article supplement (doi:10.3390/toxics10100629), 2022-10-21
Supplement: s1 [file s1]

# Human Exposure to Pesticides in Dust from Two Agricultural Sites in South Africa

Céline Degrendele <sup>1,2,\*</sup>, Roman Prokeš <sup>1,3</sup>, Petr Šenk <sup>1</sup>, Simona Rozárka Jílková <sup>1</sup>, Jiří Kohoutek <sup>1</sup>, Lisa Melymuk <sup>1</sup>, Petra Příbylová <sup>1</sup>, Mohamed Aqiel Dalvie <sup>4</sup>, Martin Rösli <sup>5,6</sup>, Jana Klánová <sup>1</sup>, and Samuel Fuhrmann <sup>5,6,7</sup>

<sup>1</sup> RECETOX, Faculty of Science, Masaryk University, 602 00 Brno, Czech Republic

<sup>2</sup> Aix-Marseille University, CNRS, LCE, 13003 Marseille, France

<sup>3</sup> Global Change Research Institute of the Czech Academy of Sciences, 603 00 Brno, Czech Republic

<sup>4</sup> Centre for Environmental and Occupational Health Research, School of Public Health and Family Medicine, University of Cape Town, Cape Town 7925, South Africa

<sup>5</sup> University of Basel, 4002 Basel, Switzerland

<sup>6</sup> Swiss Tropical and Public Health Institute (Swiss TPH), 4002 Basel, Switzerland

<sup>7</sup> Institute for Risk Assessment Sciences (IRAS), Utrecht University, 3584 Utrecht, The Netherlands

\* Correspondence: celine.degrendele@recetox.muni.cz

Number of pages: 17

Number of Tables: 9

Number of Figures: 7

## TABLE OF CONTENTS

### List of Tables:

|                                                                                                    |    |
|----------------------------------------------------------------------------------------------------|----|
| Table S1: Average recoveries and their standard deviations determined from spiking experiments.... | S2 |
| Table S2: Input parameters used for the assessment of daily intakes from dust ingestion .....      | S3 |

|                                                                                                                                                                  |     |
|------------------------------------------------------------------------------------------------------------------------------------------------------------------|-----|
| Table S3: Basic statistics of pesticide levels found in all dust samples. ....                                                                                   | S4  |
| Table S4: Basic statistics of pesticide levels found in all household dust samples collected at Hex River Valley. ....                                           | S5  |
| Table S5: Basic statistics of pesticide levels found in all household dust samples collected at Grabouw. ....                                                    | S6  |
| Table S6: Daily intake (in $\text{pg kg}^{-1} \text{ day}^{-1}$ ) of individual pesticides via dust ingestion for a child .....                                  | S7  |
| Table S7: Daily intake (in $\text{pg kg}^{-1} \text{ day}^{-1}$ ) of individual pesticides via dust ingestion for an adult .....                                 | S8  |
| Table S8: Hazard quotients of children due to the exposure to individual pesticides via dust ingestion, inhalation, and soil ingestion found in this study ..... | S9  |
| Table S9: Hazard quotients of adults due to the exposure to individual pesticides via dust ingestion, inhalation, and soil ingestion found in this study .....   | S10 |

### List of Figures:

|                                                                                                                                                                                                                                                 |     |
|-------------------------------------------------------------------------------------------------------------------------------------------------------------------------------------------------------------------------------------------------|-----|
| Figure S1: Dust levels of individual pesticides in 12 households and one school measured at day 1 and day 7 .....                                                                                                                               | S11 |
| Figure S2: Boxplots of concentrations of individual pesticides in dust samples .....                                                                                                                                                            | S12 |
| Figure S3: Contribution of three exposure pathways on the daily uptake of pesticides of a children living at farm and village locations at Hex River Valley and Grabouw using the maximum concentrations.....                                   | S13 |
| Figure S4: Contribution of three exposure pathways on the daily uptake of pesticides of a children living at farm and village locations at Hex River Valley and Grabouw using the median concentrations and high ingestion rate .....           | S14 |
| Figure S5: Contribution of three exposure pathways on the daily uptake of pesticides of an adult living at farm and village locations at Hex River Valley and Grabouw using the median concentrations ...                                       | S15 |
| Figure S6: Contribution of three exposure pathways on the daily uptake of pesticides of an adult living at farm and village locations at Hex River Valley and Grabouw using the maximum concentrations                                          | S16 |
| Figure S7: Contribution of three exposure pathways on the daily uptake of pesticides of an adult living at farm and village locations at Hex River Valley and Grabouw using the median concentrations and the high ingestion rate of dust ..... | S17 |

Table S1: Average recoveries and their standard deviations determined from spiking experiments. (n3)

|                 | Dust         |
|-----------------|--------------|
| Acetochlor      | 42.5 (2.9)   |
| Alachlor        | 96.1 (13.6)  |
| Atrazine        | 60.9 (10.7)  |
| Azinphos methyl | 113.8 (27.5) |
| Carbaryl        | 69.9 (3.0)   |
| Carbendazim     | 109.8 (10.3) |

|                  |              |
|------------------|--------------|
| Chlorotoluron    | 80.6 (4.1)   |
| Chlorpyrifos     | 55.3 (14.8)  |
| Chlorsulfuron    | 120.1 (1.9)  |
| Diazinon         | 49.6 (7.2)   |
| Dimethachlor     | 95.8 (6.4)   |
| Dimethoate       | 90.2 (4.2)   |
| Diuron           | 85.9 (3.5)   |
| Fenitrothion     | 96.8 (10.8)  |
| Fluroxypyr       | 110.7 (17.5) |
| Isoproturon      | 75.2 (3.7)   |
| Malathion        | 109.7 (20.3) |
| Metamitron       | 95.6 (5.2)   |
| Metazachlor      | 96.5 (4.0)   |
| Metribuzin       | 89.4 (4.7)   |
| Parathion methyl | 100.4 (3.7)  |
| Pendimethalin    | 87.7 (9.4)   |
| Pirimicarb       | 48.0 (10.3)  |
| Prochloraz       | 95.4 (1.3)   |
| Propiconazole    | 110.6 (3.2)  |
| Pyrazon          | 89.8 (2.0)   |
| Simazine         | 85.8 (5.2)   |
| S-metolachlor    | 84.7 (4.2)   |
| Tebuconazole     | 106.7 (6.5)  |
| Terbuthylazine   | 94.6 (2.9)   |

Table S2: Input parameters used for the assessment of daily intakes from dust ingestion.

|                             | Children | Adult | Reference |
|-----------------------------|----------|-------|-----------|
| IngR <sub>dust</sub> Median | 0.04     | 0.02  | [75]      |
| High                        | 0.1      | 0.06  | [75]      |
| AF                          | 0.14     | 0.14  | [76]      |
| BW                          | 31.8     | 80    | [75]      |

Table S3: Basic statistics of pesticide levels found in all dust samples. QF indicates quantification frequency in percentage; IQR indicates interquartile range. For propiconazole, S-metolachlor, diuron, and malathion, only the concentrations above the quantification limits were considered, while for the remaining pesticides, imputed data were considered for statistics.

|                        |        | <b>chlorpyrifos</b> | <b>terbuthylazine</b> | <b>carbaryl</b> | <b>diazinon</b> | <b>carbendazim</b> | <b>tebuconazole</b> | <b>propiconazole</b> | <b>S-metolachlor</b> | <b>diuron</b> | <b>malathion</b> |
|------------------------|--------|---------------------|-----------------------|-----------------|-----------------|--------------------|---------------------|----------------------|----------------------|---------------|------------------|
| All<br>samples<br>n=54 | QF     | 96                  | 91                    | 74              | 74              | 61                 | 59                  | 9                    | 4                    | 4             | 4                |
|                        | Mean   | 1,180               | 9.57                  | 960             | 119             | 21.6               | 14.2                |                      |                      |               |                  |
|                        | Median | 288                 | 4.75                  | 247             | 10.9            | 7.02               | 4.77                |                      |                      |               |                  |
|                        | Min    | 0                   | 0.05                  | 5               | 0.29            | 0.14               | 0.19                | 3.63                 | 10.3                 | 26.8          | 43.9             |
|                        | Max    | 19,500              | 90.8                  | 17,200          | 2,210           | 279                | 99.0                | 12.5                 | 46.6                 | 26.8          | 150              |
|                        | IQR25  | 143                 | 2.97                  | 20.0            | 1.32            | 0.15               | 0.20                |                      |                      |               |                  |
|                        | IQR75  | 968                 | 9.51                  | 544             | 31.2            | 15.3               | 16.1                |                      |                      |               |                  |
| Households<br>n=50     | QF     | 96                  | 90                    | 76              | 72              | 60                 | 58                  | 8                    | 4                    | 2             | 4                |
|                        | Mean   | 1,250               | 9.30                  | 1,020           | 122             | 16.3               | 13.6                |                      |                      |               |                  |
|                        | Median | 365                 | 4.54                  | 247             | 9.29            | 7.02               | 4.38                |                      |                      |               |                  |
|                        | Min    | 0                   | 0.05                  | 5               | 0.29            | 0.14               | 0.19                | 3.63                 | 10.3                 | 26.0          | 43.9             |
|                        | Max    | 19,500              | 90.8                  | 17,200          | 2,210           | 257                | 99.0                | 12.5                 | 46.6                 | 26.8          | 150              |
|                        | IQR25  | 135                 | 2.76                  | 64.0            | 0.30            | 0.15               | 0.20                |                      |                      |               |                  |
|                        | IQR75  | 986                 | 9.25                  | 544             | 31.2            | 14.2               | 15.8                |                      |                      |               |                  |

Table S4: Basic statistics of pesticide levels (in ng g<sup>-1</sup>) found in all household dust samples collected at Hex River Valley. QF indicates quantification frequency in percentage; IQR indicates interquartile range. For propiconazole, S-metolachlor, diuron, and malathion, only the concentrations above the quantification limits were considered, while for the remaining pesticides, imputed data were considered for statistics.

|                                                           |        | chlorpyrifos | terbuthylazine | carbaryl | diazinon | carbendazim | tebuconazole | propiconazole | S-metolachlor | diuron | malathion |
|-----------------------------------------------------------|--------|--------------|----------------|----------|----------|-------------|--------------|---------------|---------------|--------|-----------|
| Hex River Valley<br>(farm, village, day 1,<br>day 7) n=25 | QF     | 96           | 96             | 60       | 68       | 36          | 92           | 8             | 0             | 0      | 0         |
|                                                           | Mean   | 1,810        | 5.38           | 292      | 136      | 17.5        | 25.1         |               |               |        |           |
|                                                           | Median | 398          | 4.47           | 102      | 6.41     | 0.15        | 15.7         |               |               |        |           |
|                                                           | Min    | 0            | 0.05           | 5        | 0.29     | 0.14        | 0.20         | 3.63          |               |        |           |
|                                                           | Max    | 19,500       | 11.0           | 1,980    | 1,680    | 257         | 99.0         | 9.60          |               |        |           |
|                                                           | IQR25  | 142          | 3.04           | 5        | 0.29     | 0.15        | 7.96         |               |               |        |           |
|                                                           | IQR75  | 1,850        | 7.70           | 266      | 15.5     | 7.45        | 35.4         |               |               |        |           |
| Hex River Valley<br>(farm, village, day 7)<br>n=19        | QF     | 95           | 95             | 58       | 63       | 37          | 100          | 11            | 0             | 0      | 0         |
|                                                           | Mean   | 2,040        | 5.26           | 292      | 105      | 21.7        | 30.6         |               |               |        |           |
|                                                           | Median | 255          | 4.47           | 82       | 7.71     | 0.15        | 24.1         |               |               |        |           |
|                                                           | Min    | 0            | 0.05           | 5        | 0.29     | 0.14        | 2.98         | 3.63          |               |        |           |
|                                                           | Max    | 19,500       | 11.0           | 1,980    | 1,680    | 257         | 99.0         | 9.60          |               |        |           |
|                                                           | IQR25  | 126          | 2.70           | 5        | 0.29     | 0.15        | 10.0         |               |               |        |           |
|                                                           | IQR75  | 1,880        | 7.68           | 247      | 24.2     | 7.26        | 38.4         |               |               |        |           |
| Hex River Valley<br>(village, day 7) n=9                  | QF     | 89           | 89             | 67       | 78       | 33          | 100          | 22            | 0             | 0      | 0         |
|                                                           | Mean   | 2,520        | 4.41           | 485      | 209      | 5.29        | 18.6         |               |               |        |           |
|                                                           | Median | 189          | 3.87           | 82       | 15.3     | 0.15        | 10.6         |               |               |        |           |
|                                                           | Min    | 0            | 0.05           | 5        | 0.29     | 0.14        | 2.98         | 3.63          |               |        |           |
|                                                           | Max    | 19,500       | 10.5           | 1,980    | 1,680    | 32.2        | 63.5         | 9.60          |               |        |           |
|                                                           | IQR25  | 127          | 2.26           | 5        | 6.41     | 0.14        | 4.43         |               |               |        |           |
|                                                           | IQR75  | 425          | 6.30           | 283      | 54.5     | 7.06        | 24.1         |               |               |        |           |
| Hex River Valley<br>(farm, day 7) n=10                    | QF     | 100          | 100            | 50       | 50       | 40          | 100          | 0             | 0             | 0      | 0         |
|                                                           | Mean   | 1,610        | 6.03           | 118      | 9.75     | 36.4        | 41.4         |               |               |        |           |
|                                                           | Median | 333          | 6.14           | 54       | 2.38     | 0.15        | 35.9         |               |               |        |           |
|                                                           | Min    | 73           | 1.65           | 5        | 0.29     | 0.14        | 7.96         |               |               |        |           |
|                                                           | Max    | 4,900        | 11.0           | 521      | 36.1     | 257         | 99.0         |               |               |        |           |
|                                                           | IQR25  | 152          | 3.47           | 5        | 0.29     | 0.15        | 19.0         |               |               |        |           |
|                                                           | IQR75  | 3,100        | 8.13           | 166      | 13.0     | 25.6        | 59.5         |               |               |        |           |

Table S5: Basic statistics of pesticide levels (in ng g<sup>-1</sup>) found in all household dust samples collected at Grabouw. QF indicates quantification frequency in percentage; IQR indicates interquartile range. For propiconazole, S-metolachlor, diuron, and malathion, only the concentrations above the quantification limits were considered, while for the remaining pesticides, imputed data were considered for statistics.

|                                               |        | chlorpyrifos | terbuthylazine | carbaryl | diazinon | carbendazim | tebuconazole | propiconazole | S-metolachlor | diuron | malathion |
|-----------------------------------------------|--------|--------------|----------------|----------|----------|-------------|--------------|---------------|---------------|--------|-----------|
| Grabouw (farm, village,<br>day 1, day 7) n=25 | QF     | 96           | 84             | 92       | 76       | 84          | 24           | 8             | 8             | 4      | 8         |
|                                               | Mean   | 690          | 13.2           | 1,740    | 109      | 15.1        | 2.04         |               |               |        |           |
|                                               | Median | 268          | 4.62           | 525      | 11.2     | 11.0        | 0.20         |               |               |        |           |
|                                               | Min    | 0            | 0.05           | 5        | 0.29     | 0.14        | 0.19         | 3.63          | 10.3          | 26.8   | 43.9      |
|                                               | Max    | 4,700        | 90.8           | 17,200   | 2,210    | 64.1        | 19.60        | 12.5          | 46.6          | 26.8   | 150       |
|                                               | IQR25  | 133          | 2.70           | 207      | 4.37     | 5.94        | 0.19         |               |               |        |           |
|                                               | IQR75  | 948          | 13.6           | 1,660    | 37.4     | 17.8        | 0.20         |               |               |        |           |
| Grabouw (farm, village,<br>day 7) n=19        | QF     | 95           | 84             | 100      | 68       | 84          | 32           | 11            | 5             | 5      | 11        |
|                                               | Mean   | 801          | 14.5           | 1,820    | 137      | 14.2        | 2.62         |               |               |        |           |
|                                               | Median | 366          | 4.62           | 537      | 10.9     | 11.0        | 0.20         |               |               |        |           |
|                                               | Min    | 0            | 0.05           | 69       | 0.29     | 0.14        | 0.19         | 7.00          |               |        | 43.9      |
|                                               | Max    | 4,700        | 90.8           | 17,200   | 2,210    | 34.9        | 19.60        | 12.5          | 46.6          | 26.8   | 150       |
|                                               | IQR25  | 123          | 2.82           | 261      | 0.29     | 7.59        | 0.19         |               |               |        |           |
|                                               | IQR75  | 961          | 13.5           | 1,320    | 39.2     | 22.1        | 1.45         |               |               |        |           |
| Grabouw (village, day 7)<br>n=9               | QF     | 89           | 89             | 100      | 89       | 100         | 44           | 22            | 11            | 11     | 11        |
|                                               | Mean   | 216          | 5.95           | 2,430    | 281      | 20.8        | 5.04         |               |               |        |           |
|                                               | Median | 113          | 4.62           | 540      | 40.9     | 14.3        | 0.20         |               |               |        |           |
|                                               | Min    | 0            | 0.05           | 69       | 0.29     | 8.19        | 0.19         | 3.63          |               |        |           |
|                                               | Max    | 1,070        | 13.6           | 17,200   | 2,210    | 34.9        | 19.60        | 12.5          | 46.6          | 26.8   | 43.9      |
|                                               | IQR25  | 86           | 2.94           | 207      | 11.19    | 10.1        | 0.20         |               |               |        |           |
|                                               | IQR75  | 181          | 7.75           | 610      | 73.7     | 32.4        | 8.76         |               |               |        |           |
| Grabouw (farm, day 7)<br>n=10                 | QF     | 100          | 80             | 100      | 50       | 70          | 20           | 0             | 0             | 0      | 10        |
|                                               | Mean   | 1,330        | 22.3           | 1,280    | 7.84     | 8.32        | 0.44         |               |               |        |           |
|                                               | Median | 714          | 7.53           | 475      | 2.55     | 7.59        | 0.19         |               |               |        |           |
|                                               | Min    | 268          | 0.05           | 122      | 0.29     | 0.14        | 0.19         |               |               |        |           |
|                                               | Max    | 4,700        | 90.8           | 4,180    | 37.4     | 30.2        | 2.60         |               |               |        | 150       |
|                                               | IQR25  | 422          | 2.95           | 328      | 0.29     | 0.17        | 0.19         |               |               |        |           |
|                                               | IQR75  | 1,070        | 30.2           | 1,490    | 9.67     | 12.3        | 0.20         |               |               |        |           |

Table S6: Daily intake (in pg kg<sup>-1</sup> day<sup>-1</sup>) of individual pesticides via dust ingestion for a child.

|             |                  |         |        | chlorpyrifos | terbuthylazine | carbaryl | diazinon | carbendazim | tebuconazole | propiconazole | S-metolachlor | diuron | malathion |
|-------------|------------------|---------|--------|--------------|----------------|----------|----------|-------------|--------------|---------------|---------------|--------|-----------|
| Median IngR | Hex River Valley | Village | Median | 30.9         | 0.88           | 10.4     | 2.24     | 0.33        | 3.52         | 0             | 0             | 0      | 0         |
|             |                  |         | Max    | 2,410        | 1.70           | 244      | 208      | 4.28        | 10.1         | 1.18          | 0             | 0      | 0         |
|             |                  | Farm    | Median | 48.6         | 1.16           | 6.90     | 0.65     | 0.33        | 6.65         | 0             | 0             | 0      | 0         |
|             |                  |         | Max    | 611          | 1.75           | 64.5     | 4.80     | 32.0        | 14.4         | 0             | 0             | 0      | 0         |
|             | Grabouw          | Village | Median | 26.4         | 1.12           | 94.9     | 6.05     | 10.9        | 0.16         | 0.26          | 0             | 0.71   | 0         |
|             |                  |         | Max    | 146          | 2.52           | 2,150    | 273      | 19.0        | 2.69         | 2.05          | 5.74          | 4.72   | 5.41      |
|             |                  | Farm    | Median | 100          | 1.48           | 86.9     | 1.32     | 10.1        | 0.16         | 0.26          | 0             | 0.71   | 0         |
|             |                  |         | Max    | 594          | 12.0           | 546      | 5.97     | 18.5        | 0.59         | 0.51          | 0             | 1.42   | 18.4      |
| Max IngR    | Hex River Valley | Village | Median | 77.3         | 2.20           | 26.0     | 5.60     | 0.82        | 8.81         | 0             | 0             | 0      | 0         |
|             |                  |         | Max    | 6,037        | 4.24           | 611      | 519      | 10.7        | 25.1         | 2.96          | 0             | 0      | 0         |
|             |                  | Farm    | Median | 122          | 2.90           | 17.3     | 1.61     | 0.82        | 16.6         | 0             | 0             | 0      | 0         |
|             |                  |         | Max    | 1,530        | 4.39           | 161      | 12.0     | 79.9        | 36.1         | 0             | 0             | 0      | 0         |
|             | Grabouw          | Village | Median | 66.0         | 2.79           | 237      | 15.1     | 27.4        | 0.41         | 0.64          | 0             | 1.77   | 0         |
|             |                  |         | Max    | 365          | 6.31           | 5,380    | 684      | 47.6        | 6.71         | 5.13          | 14.4          | 11.8   | 13.5      |
|             |                  | Farm    | Median | 251          | 3.69           | 217      | 3.31     | 25.3        | 0.41         | 0.64          | 0             | 1.77   | 0         |
|             |                  |         | Max    | 1,490        | 30.1           | 1,370    | 14.9     | 46.2        | 1.47         | 1.28          | 0             | 3.54   | 46.1      |

Table S7: Daily intake (in pg kg<sup>-1</sup> day<sup>-1</sup>) of individual pesticides via dust ingestion for an adult.

|                |                     |         |        | chlorpyrifos | terbuthylazine | carbaryl | diazinon | carbendazim | tebuconazole | propiconazole | S-metolachlor | diuron | malathion |
|----------------|---------------------|---------|--------|--------------|----------------|----------|----------|-------------|--------------|---------------|---------------|--------|-----------|
| Median<br>IngR | Hex River<br>Valley | Village | Median | 6.63         | 0.14           | 2.88     | 0.54     | 0.01        | 0.37         | 0             | 0             | 0      | 0         |
|                |                     |         | Max    | 683          | 0.37           | 69.3     | 58.9     | 1.13        | 2.22         | 0.34          | 0             | 0      | 0         |
|                |                     | Farm    | Median | 11.7         | 0.21           | 1.88     | 0.08     | 0.01        | 1.26         | 0             | 0             | 0      | 0         |
|                |                     |         | Max    | 172          | 0.38           | 18.2     | 1.26     | 8.99        | 3.47         | 0             | 0             | 0      | 0         |
|                | Grabouw             | Village | Median | 3.97         | 0.16           | 18.9     | 1.43     | 0.50        | 0.01         | 0             | 0             | 0      | 0         |
|                |                     |         | Max    | 37.4         | 0.48           | 602      | 77.3     | 1.22        | 0.69         | 0.44          | 1.63          | 0.94   | 1.54      |
|                |                     | Farm    | Median | 25.0         | 0.26           | 16.6     | 0.09     | 0.27        | 0.01         | 0             | 0             | 0      | 0         |
|                |                     |         | Max    | 165          | 3.18           | 146      | 1.31     | 1.06        | 0.09         | 0             | 0             | 0      | 5.23      |
| Max IngR       | Hex River<br>Valley | Village | Median | 19.9         | 0.41           | 8.63     | 1.61     | 0.02        | 1.11         | 0             | 0             | 0      | 0         |
|                |                     |         | Max    | 2,050        | 1.10           | 208      | 177      | 3.38        | 6.67         | 1.01          | 0             | 0      | 0         |
|                |                     | Farm    | Median | 35.0         | 0.64           | 5.64     | 0.25     | 0.02        | 3.77         | 0             | 0             | 0      | 0         |
|                |                     |         | Max    | 515          | 1.15           | 54.7     | 3.79     | 27.0        | 10.40        | 0             | 0             | 0      | 0         |
|                | Grabouw             | Village | Median | 11.9         | 0.48           | 56.7     | 4.29     | 1.50        | 0.02         | 0             | 0             | 0      | 0         |
|                |                     |         | Max    | 112          | 1.43           | 1,810    | 232      | 3.66        | 2.06         | 1.31          | 4.89          | 2.81   | 4.61      |
|                |                     | Farm    | Median | 75.0         | 0.79           | 49.9     | 0.27     | 0.80        | 0.02         | 0             | 0             | 0      | 0         |
|                |                     |         | Max    | 494          | 9.53           | 439.1    | 3.93     | 3.17        | 0.27         | 0             | 0             | 0      | 15.7      |



Table S8: Hazard quotients of children due to the exposure to individual pesticides via dust ingestion, inhalation, and soil ingestion found in this study. H, G, V, F, and IngR denote Hex River Valley, Grabouw, village, farm, and dust ingestion rate, respectively.

|                                                 |    | chlorpyrifos | terbutylazine | carbaryl | diazinon | carbendazim | tebuconazole | propiconazole | metolachlor | diuron | malathion | acetochlor | alachlor | atrazine | azinphos methyl | dimethachlor | isoproturon | metazachlor | pirimicarb | simazine |
|-------------------------------------------------|----|--------------|---------------|----------|----------|-------------|--------------|---------------|-------------|--------|-----------|------------|----------|----------|-----------------|--------------|-------------|-------------|------------|----------|
| Children<br>Cmedian<br>(with<br>Median<br>IngR) | H_ | 1.66         | 1.24E-        | 1.45E-   | 1.32E-   | 2.21E-      | 2.77E-       | 3.85E-        | 2.60E-      | 0.00E+ | 4.63E-    | 0.00E+     | 6.80E-   | 2.82E-   | 0.00E+          | 6.61E-       | 6.43E-      | 2.63E-      | 5.71E-     | 1.52E-   |
|                                                 | V  | E-04         | 04            | 05       | 05       | 07          | 05           | 08            | 07          | 00     | 06        | 00         | 08       | 08       | 00              | 08           | 11          | 09          | 10         | 06       |
|                                                 | H_ | 1.84         | 1.24E-        | 1.40E-   | 5.20E-   | 2.21E-      | 2.78E-       | 3.85E-        | 2.60E-      | 0.00E+ | 4.63E-    | 0.00E+     | 6.80E-   | 2.82E-   | 0.00E+          | 6.61E-       | 2.60E-      | 2.63E-      | 5.71E-     | 1.52E-   |
|                                                 | F  | E-04         | 04            | 05       | 06       | 07          | 05           | 08            | 07          | 00     | 06        | 00         | 08       | 08       | 00              | 08           | 10          | 09          | 10         | 06       |
|                                                 | G_ | 1.47         | 1.74E-        | 3.84E-   | 3.22E-   | 5.58E-      | 5.62E-       | 1.74E-        | 2.37E-      | 2.36E- | 4.04E-    | 2.58E-     | 6.80E-   | 3.55E-   | 4.60E-          | 2.88E-       | 6.36E-      | 0.00E+      | 0.00E+     | 3.00E-   |
|                                                 | V  | E-04         | 05            | 04       | 05       | 07          | 08           | 08            | 07          | 07     | 07        | 06         | 08       | 09       | 08              | 08           | 11          | 00          | 00         | 07       |
| Children<br>Cmax<br>(with<br>Median<br>IngR)    | G_ | 2.21         | 1.75E-        | 3.83E-   | 8.57E-   | 5.17E-      | 5.62E-       | 1.74E-        | 2.37E-      | 2.36E- | 4.04E-    | 2.58E-     | 6.80E-   | 3.55E-   | 4.60E-          | 2.88E-       | 6.36E-      | 0.00E+      | 0.00E+     | 3.00E-   |
|                                                 | F  | E-04         | 05            | 04       | 06       | 07          | 08           | 08            | 07          | 07     | 07        | 06         | 08       | 09       | 08              | 08           | 08          | 00          | 00         | 07       |
|                                                 | H_ | 2.60         | 1.83E-        | 1.15E-   | 1.04E-   | 7.18E-      | 2.80E-       | 8.68E-        | 3.98E-      | 0.00E+ | 9.53E-    | 0.00E+     | 1.04E-   | 8.15E-   | 0.00E+          | 2.02E-       | 1.33E-      | 1.13E-      | 2.00E-     | 1.83E-   |
|                                                 | V  | E-03         | 04            | 04       | 03       | 07          | 04           | 08            | 07          | 00     | 06        | 00         | 06       | 08       | 00              | 07           | 09          | 08          | 09         | 06       |
|                                                 | H_ | 7.97         | 1.83E-        | 9.13E-   | 2.85E-   | 2.10E-      | 2.80E-       | 5.73E-        | 3.98E-      | 0.00E+ | 9.53E-    | 0.00E+     | 1.04E-   | 8.15E-   | 0.00E+          | 2.02E-       | 1.33E-      | 1.13E-      | 2.00E-     | 1.83E-   |
|                                                 | F  | E-04         | 04            | 05       | 05       | 06          | 04           | 08            | 07          | 00     | 06        | 00         | 06       | 08       | 00              | 07           | 09          | 08          | 09         | 06       |
| Children<br>Cmedian<br>(with<br>High<br>IngR)   | G_ | 3.98         | 3.34E-        | 1.55E-   | 1.38E-   | 1.16E-      | 1.26E-       | 8.45E-        | 7.03E-      | 1.57E- | 6.68E-    | 1.40E-     | 5.20E-   | 4.00E-   | 1.20E-          | 1.82E-       | 6.52E-      | 0.00E+      | 0.00E+     | 1.76E-   |
|                                                 | V  | E-04         | 05            | 03       | 03       | 06          | 06           | 08            | 07          | 06     | 07        | 05         | 07       | 08       | 06              | 07           | 11          | 00          | 00         | 06       |
|                                                 | G_ | 8.46         | 3.58E-        | 1.33E-   | 4.04E-   | 1.13E-      | 1.19E-       | 4.61E-        | 6.45E-      | 4.72E- | 1.10E-    | 1.40E-     | 5.20E-   | 4.00E-   | 1.20E-          | 1.82E-       | 6.52E-      | 0.00E+      | 0.00E+     | 1.76E-   |
|                                                 | F  | E-04         | 05            | 03       | 05       | 06          | 06           | 08            | 07          | 07     | 06        | 05         | 07       | 08       | 06              | 07           | 11          | 00          | 00         | 06       |
|                                                 | H_ | 2.13         | 1.24E-        | 1.65E-   | 2.99E-   | 2.46E-      | 2.79E-       | 3.85E-        | 2.60E-      | 0.00E+ | 4.63E-    | 0.00E+     | 6.80E-   | 2.82E-   | 0.00E+          | 6.61E-       | 2.60E-      | 2.63E-      | 5.71E-     | 1.52E-   |
|                                                 | V  | E-04         | 04            | 05       | 05       | 07          | 05           | 08            | 07          | 00     | 06        | 00         | 08       | 08       | 00              | 08           | 10          | 09          | 10         | 06       |
| Children<br>Cmedian<br>(with<br>High<br>IngR)   | H_ | 2.57         | 1.24E-        | 1.54E-   | 1.00E-   | 2.46E-      | 2.81E-       | 3.85E-        | 2.60E-      | 0.00E+ | 4.63E-    | 0.00E+     | 6.80E-   | 2.82E-   | 0.00E+          | 6.61E-       | 2.60E-      | 2.63E-      | 5.71E-     | 1.52E-   |
|                                                 | F  | E-04         | 04            | 05       | 05       | 07          | 05           | 08            | 07          | 00     | 06        | 00         | 08       | 08       | 00              | 08           | 10          | 09          | 10         | 06       |
|                                                 | G_ | 1.87         | 1.78E-        | 4.03E-   | 7.76E-   | 1.38E-      | 6.44E-       | 2.70E-        | 2.37E-      | 5.90E- | 4.04E-    | 2.58E-     | 6.80E-   | 3.55E-   | 4.60E-          | 2.88E-       | 6.36E-      | 0.00E+      | 0.00E+     | 3.00E-   |
|                                                 | V  | E-04         | 05            | 04       | 05       | 06          | 08           | 08            | 07          | 07     | 07        | 06         | 08       | 09       | 08              | 08           | 08          | 00          | 00         | 07       |
|                                                 | G_ | 3.72         | 1.80E-        | 4.00E-   | 1.85E-   | 1.28E-      | 6.44E-       | 2.70E-        | 2.37E-      | 5.90E- | 4.04E-    | 2.58E-     | 6.80E-   | 3.55E-   | 4.60E-          | 2.88E-       | 6.36E-      | 0.00E+      | 0.00E+     | 3.00E-   |
|                                                 | F  | E-04         | 05            | 04       | 05       | 06          | 08           | 08            | 07          | 07     | 07        | 06         | 08       | 09       | 08              | 08           | 08          | 00          | 00         | 07       |

Table S9 : Hazard quotients of adults due to the exposure to individual pesticides via dust ingestion, inhalation and soil ingestion found in this study. H, G, V, F and IngR denote Hex River Valley, Grabouw, village, farm and dust ingestion rate, respectively.

|                                  |    | chlorpyrifos | terbutylazine | carbaryl | diazinon | carbendazim | tebuconazole | propiconazole | metolachlor | diuron | malathion | acetochlor | alachlor | atrazine | azinphos methyl | dimethachlor | isoproturon | metazachlor | pirimicarb | simazine |
|----------------------------------|----|--------------|---------------|----------|----------|-------------|--------------|---------------|-------------|--------|-----------|------------|----------|----------|-----------------|--------------|-------------|-------------|------------|----------|
| Adult Cmedian (with High IngR)   | H_ | 8.65E-       | 6.14E-        | 7.65E-   | 8.99E-   | 1.03E-      | 1.37E-       | 1.90E-        | 1.29E-      | 0.00E+ | 2.30E-    | 0.00E+     | 3.40E-   | 1.40E-   | 0.00E+          | 3.28E-       | 8.53E-      | 1.25E-      | 7.14E-     | 7.58E-   |
|                                  | V  | 05           | 05            | 06       | 06       | 07          | 05           | 08            | 07          | 00     | 06        | 00         | 08       | 08       | 00              | 08           | 12          | 09          | 11         | 07       |
|                                  | H_ | 1.02E-       | 6.14E-        | 7.25E-   | 2.20E-   | 1.03E-      | 1.38E-       | 1.90E-        | 1.29E-      | 0.00E+ | 2.30E-    | 0.00E+     | 3.40E-   | 1.40E-   | 0.00E+          | 3.28E-       | 8.53E-      | 1.25E-      | 7.14E-     | 7.58E-   |
|                                  | F  | 04           | 05            | 06       | 06       | 07          | 05           | 08            | 07          | 00     | 06        | 00         | 08       | 08       | 00              | 08           | 12          | 09          | 11         | 07       |
| Adult Cmedian (with Median IngR) | G_ | 5.58E-       | 8.62E-        | 1.92E-   | 2.24E-   | 7.99E-      | 2.60E-       | 5.50E-        | 1.18E-      | 0.00E+ | 2.01E-    | 1.28E-     | 3.40E-   | 1.51E-   | 2.40E-          | 2.88E-       | 8.40E-      | 0.00E+      | 0.00E+     | 1.47E-   |
|                                  | V  | 05           | 06            | 04       | 05       | 08          | 08           | 09            | 07          | 00     | 07        | 06         | 08       | 09       | 08              | 08           | 12          | 00          | 00         | 07       |
|                                  | G_ | 1.19E-       | 8.69E-        | 1.91E-   | 2.29E-   | 4.48E-      | 2.60E-       | 5.50E-        | 1.18E-      | 0.00E+ | 2.01E-    | 1.28E-     | 3.40E-   | 1.51E-   | 2.40E-          | 2.88E-       | 8.40E-      | 0.00E+      | 0.00E+     | 1.47E-   |
|                                  | F  | 04           | 06            | 04       | 06       | 08          | 08           | 09            | 07          | 00     | 07        | 06         | 08       | 09       | 08              | 08           | 12          | 00          | 00         | 07       |
| Adult Cmax (with Median IngR)    | H_ | 7.33E-       | 6.13E-        | 6.88E-   | 3.63E-   | 1.02E-      | 1.37E-       | 1.90E-        | 1.29E-      | 0.00E+ | 2.30E-    | 0.00E+     | 3.40E-   | 1.40E-   | 0.00E+          | 3.28E-       | 8.53E-      | 1.25E-      | 7.14E-     | 7.58E-   |
|                                  | V  | 05           | 05            | 06       | 06       | 07          | 05           | 08            | 07          | 00     | 06        | 00         | 08       | 08       | 00              | 08           | 12          | 09          | 11         | 07       |
|                                  | H_ | 7.83E-       | 6.13E-        | 6.75E-   | 1.37E-   | 1.02E-      | 1.37E-       | 1.90E-        | 1.29E-      | 0.00E+ | 2.30E-    | 0.00E+     | 3.40E-   | 1.40E-   | 0.00E+          | 3.28E-       | 8.53E-      | 1.25E-      | 7.14E-     | 7.58E-   |
|                                  | F  | 05           | 05            | 06       | 06       | 07          | 05           | 08            | 07          | 00     | 06        | 00         | 08       | 08       | 00              | 08           | 12          | 09          | 11         | 07       |
| Adult Cmax (with Median IngR)    | G_ | 4.78E-       | 8.54E-        | 1.87E-   | 8.11E-   | 3.00E-      | 2.56E-       | 5.50E-        | 1.18E-      | 0.00E+ | 2.01E-    | 1.28E-     | 3.40E-   | 1.51E-   | 2.40E-          | 2.88E-       | 8.40E-      | 0.00E+      | 0.00E+     | 1.47E-   |
|                                  | V  | 05           | 06            | 04       | 06       | 08          | 08           | 09            | 07          | 00     | 07        | 06         | 08       | 09       | 08              | 08           | 12          | 00          | 00         | 07       |
|                                  | G_ | 6.88E-       | 8.56E-        | 1.87E-   | 1.40E-   | 1.83E-      | 2.56E-       | 5.50E-        | 1.18E-      | 0.00E+ | 2.01E-    | 1.28E-     | 3.40E-   | 1.51E-   | 2.40E-          | 2.88E-       | 8.40E-      | 0.00E+      | 0.00E+     | 1.47E-   |
|                                  | F  | 05           | 06            | 04       | 06       | 08          | 08           | 09            | 07          | 00     | 07        | 06         | 08       | 09       | 08              | 08           | 12          | 00          | 00         | 07       |
| Adult Cmax (with Median IngR)    | H_ | 7.75E-       | 9.08E-        | 5.03E-   | 2.97E-   | 3.07E-      | 1.39E-       | 3.69E-        | 1.98E-      | 0.00E+ | 4.73E-    | 0.00E+     | 5.18E-   | 4.01E-   | 0.00E+          | 1.00E-       | 1.99E-      | 5.63E-      | 2.86E-     | 9.02E-   |
|                                  | V  | 04           | 05            | 05       | 04       | 07          | 04           | 08            | 07          | 00     | 06        | 00         | 07       | 08       | 00              | 07           | 10          | 09          | 10         | 07       |
|                                  | H_ | 2.63E-       | 9.08E-        | 4.35E-   | 8.53E-   | 7.00E-      | 1.39E-       | 2.85E-        | 1.98E-      | 0.00E+ | 4.73E-    | 0.00E+     | 5.18E-   | 4.01E-   | 0.00E+          | 1.00E-       | 1.99E-      | 5.63E-      | 2.86E-     | 9.02E-   |
|                                  | F  | 04           | 05            | 05       | 06       | 07          | 04           | 08            | 07          | 00     | 06        | 00         | 07       | 08       | 00              | 07           | 10          | 09          | 10         | 07       |
| Adult Cmax (with Median IngR)    | G_ | 1.41E-       | 1.64E-        | 7.06E-   | 3.92E-   | 1.65E-      | 6.05E-       | 2.74E-        | 3.37E-      | 3.13E- | 2.94E-    | 6.97E-     | 2.58E-   | 1.96E-   | 5.94E-          | 9.06E-       | 8.67E-      | 0.00E+      | 0.00E+     | 8.68E-   |
|                                  | V  | 04           | 05            | 04       | 04       | 07          | 07           | 08            | 07          | 07     | 07        | 06         | 07       | 08       | 07              | 08           | 12          | 00          | 00         | 07       |
|                                  | G_ | 2.68E-       | 1.70E-        | 6.45E-   | 1.18E-   | 1.57E-      | 5.85E-       | 1.65E-        | 3.21E-      | 0.00E+ | 4.17E-    | 6.97E-     | 2.58E-   | 1.96E-   | 5.94E-          | 9.06E-       | 8.67E-      | 0.00E+      | 0.00E+     | 8.68E-   |
|                                  | F  | 04           | 05            | 04       | 05       | 07          | 07           | 08            | 07          | 00     | 07        | 06         | 07       | 08       | 07              | 08           | 12          | 00          | 00         | 07       |

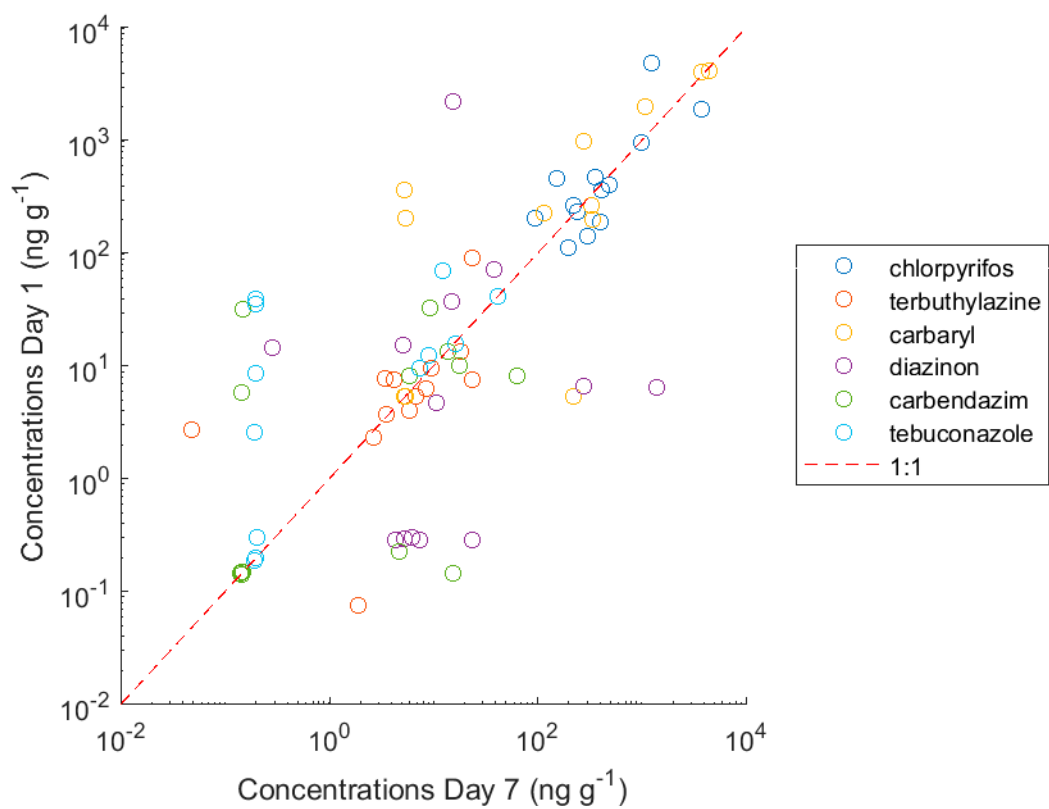

Figure S1: Dust levels of individual pesticides (in  $\text{ng g}^{-1}$ ) in 12 households and one school measured at day 1 and day 7.

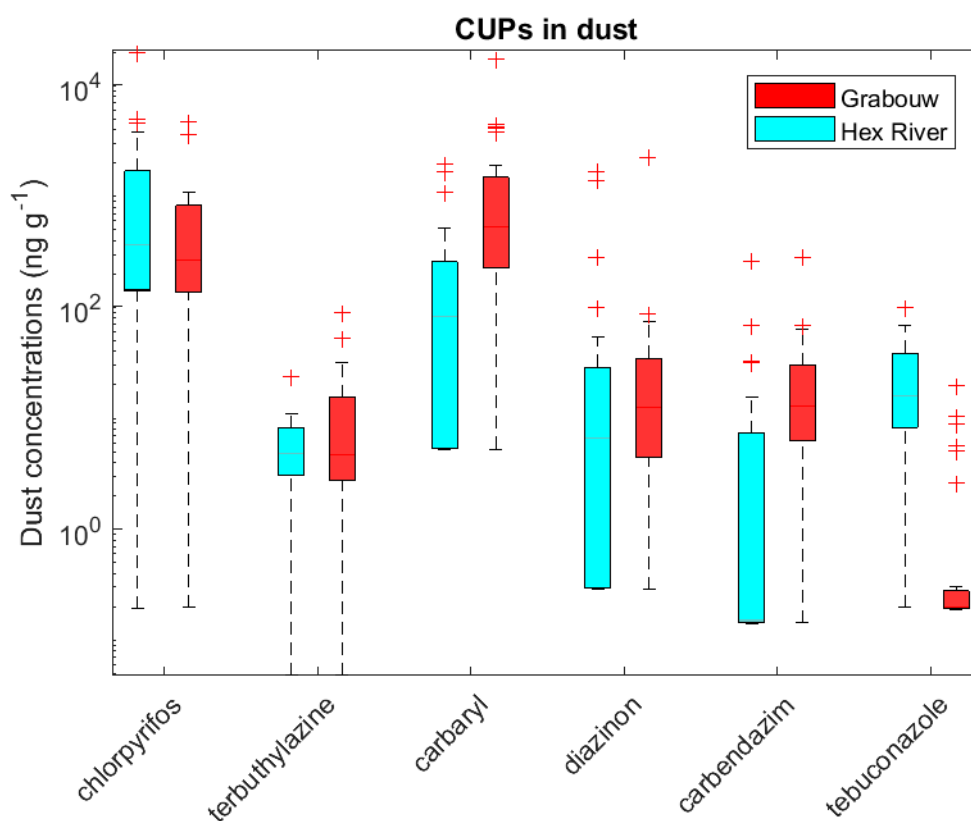

Figure S2: Boxplots of concentrations of individual pesticides in dust samples (in  $\text{ng g}^{-1}$ ). All samples (i.e., day 1, day 7, village, farm, and schools,  $n=54$ ) were considered. Boxplots represent the 25-75<sup>th</sup> percentile, whiskers represent the minimum and maximum values (excluding outliers which are shown as the red crosses) and the line within the box represents the median value.

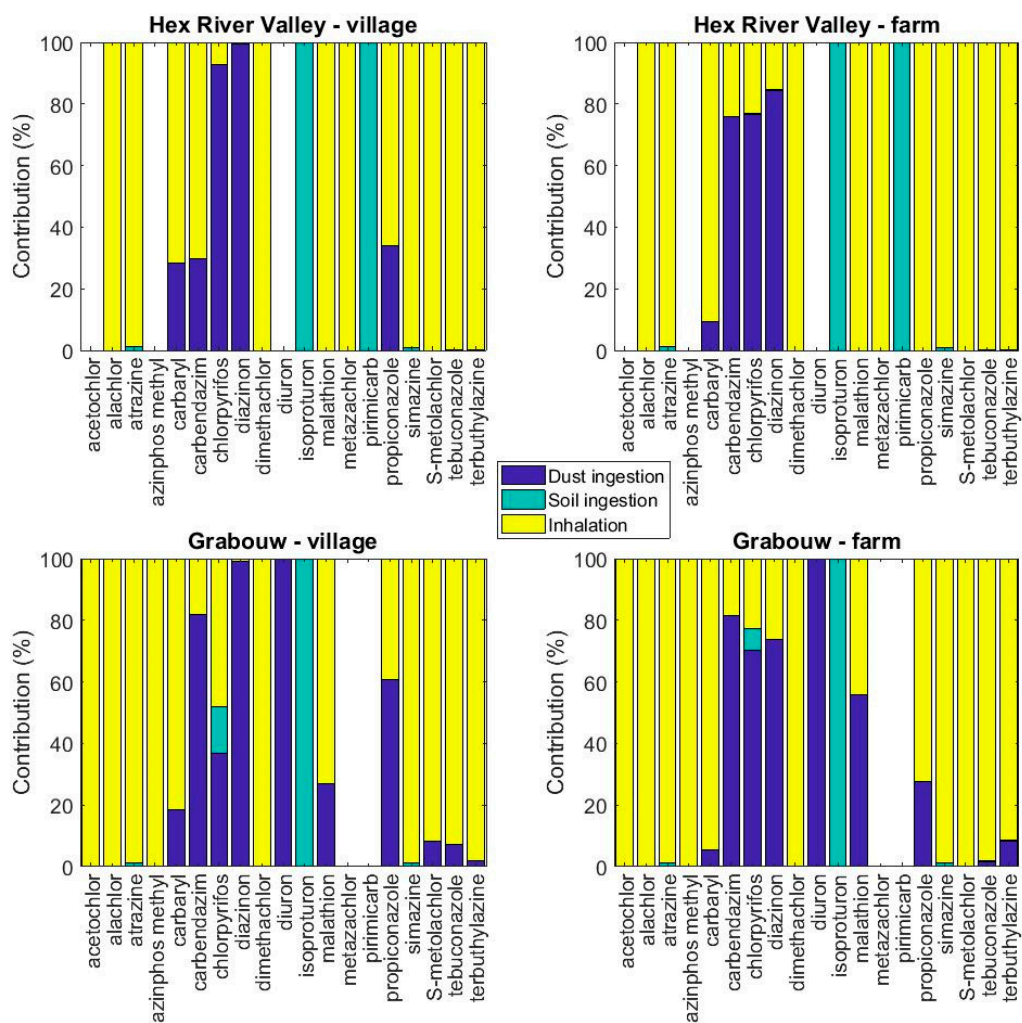

Figure S3: Contribution (in %) of three exposure pathways (dust ingestion, soil ingestion, and inhalation) on the daily uptake of pesticides of a children living at farm and village locations at Hex River Valley and Grabouw using the maximum concentrations. Data on the daily intakes from inhalation and soil ingestion of individual pesticides were obtained from [68].

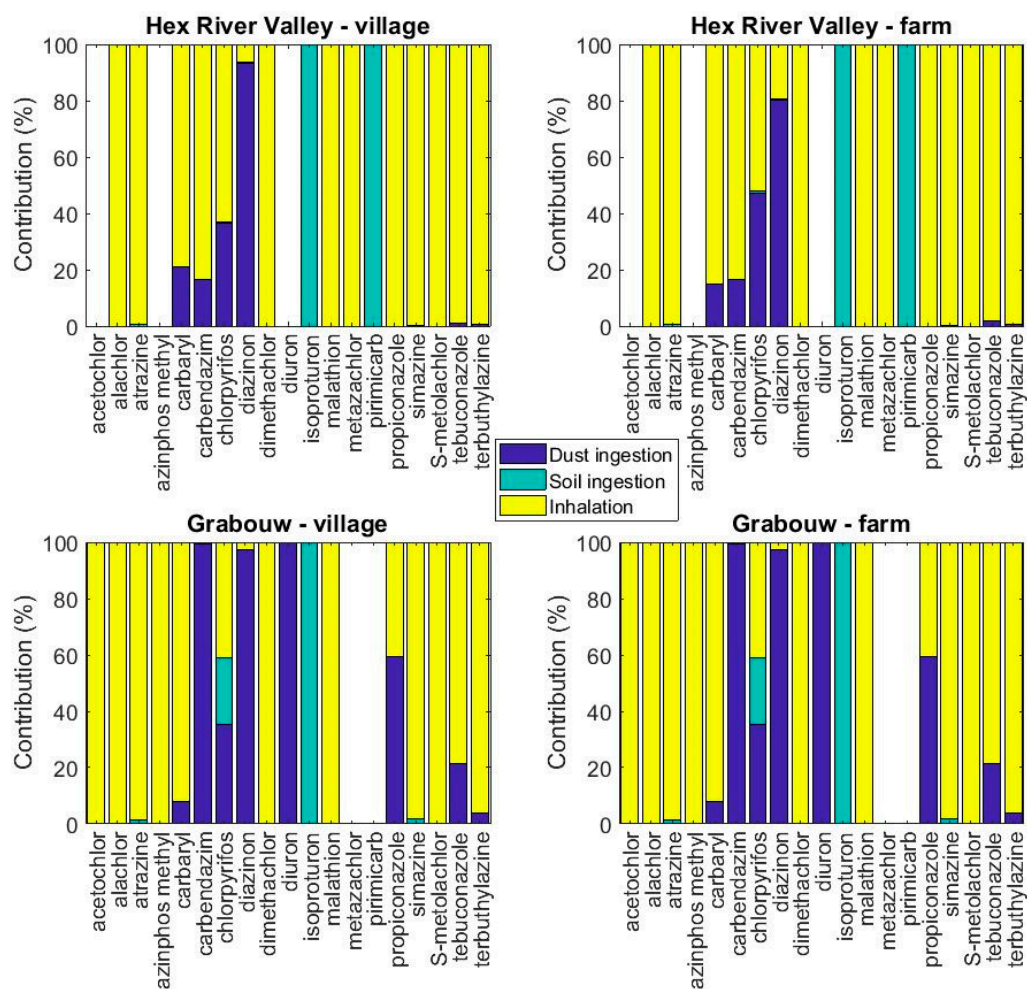

Figure S4: Contribution (in %) of three exposure pathways (dust ingestion, soil ingestion, and inhalation) on the daily uptake of pesticides of a children living at farm and village locations at Hex River Valley and Grabouw using the median concentrations and high ingestion rate. Data on the daily intakes from inhalation and soil ingestion of individual pesticides were obtained from [68].

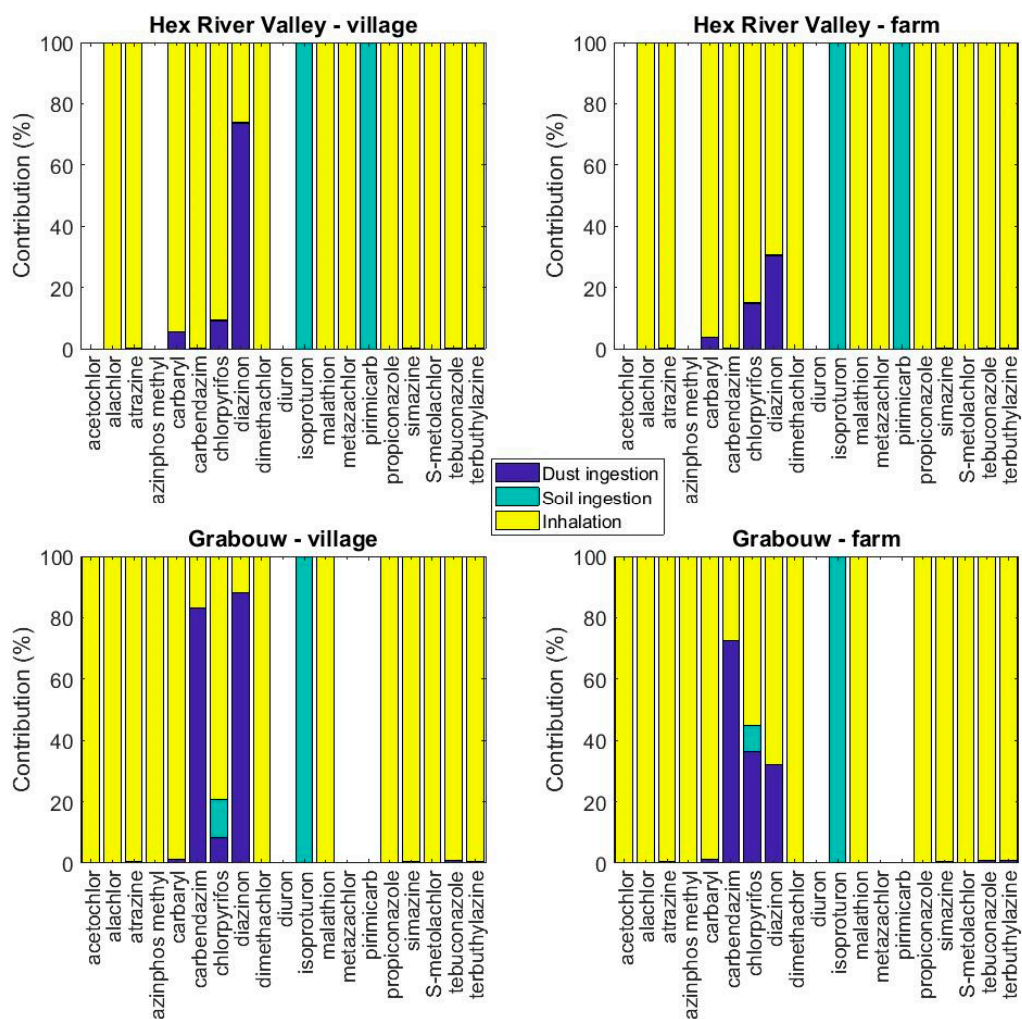

Figure S5: Contribution (in %) of three exposure pathways (dust ingestion, soil ingestion, and inhalation) on the daily uptake of pesticides of an adult living at farm and village locations at Hex River Valley and Grabouw using the median concentrations. Data on the daily intakes from inhalation and soil ingestion of individual pesticides were obtained from [68].

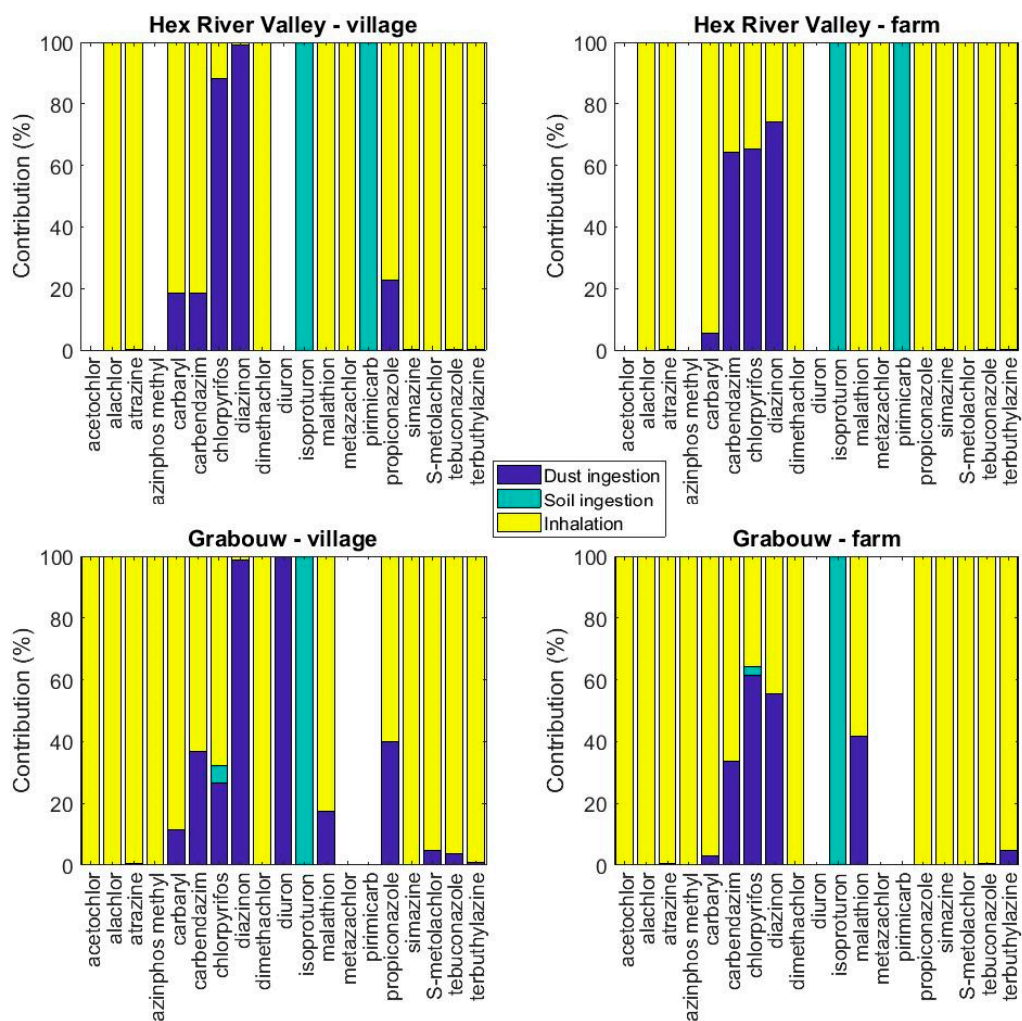

Figure S6: Contribution (in %) of three exposure pathways (dust ingestion, soil ingestion, and inhalation) on the daily uptake of pesticides of an adult living at farm and village locations at Hex River Valley and Grabouw using the maximum concentrations. Data on the daily intakes from inhalation and soil ingestion of individual pesticides were obtained from [68].



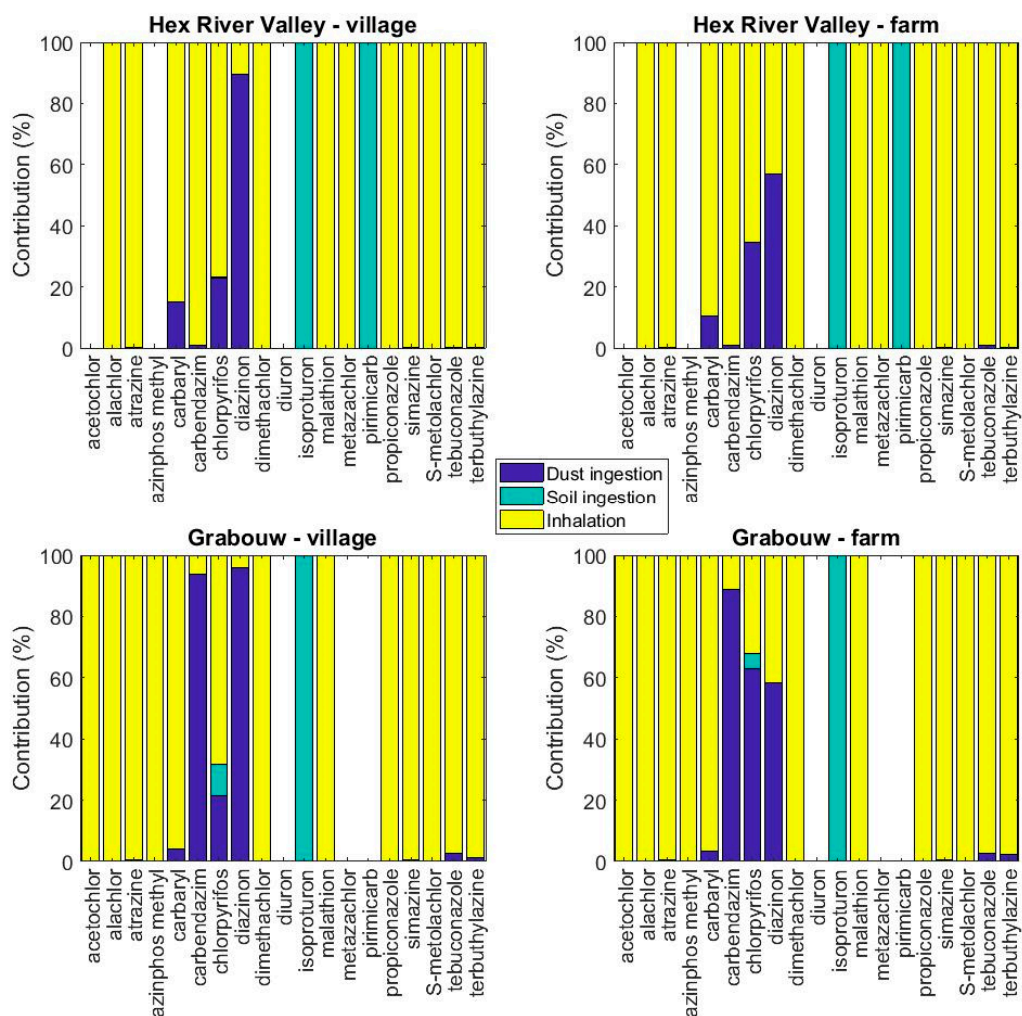

Figure S7: Contribution (in %) of three exposure pathways (dust ingestion, soil ingestion, and inhalation) on the daily uptake of pesticides of an adult living at farm and village locations at Hex River Valley and Grabouw using the median concentrations and the high ingestion rate of dust. Data on the daily intakes from inhalation and soil ingestion of individual pesticides were obtained from [68].
